# Supplementary material for: Phospho‐regulated Bim1/EB1 interactions trigger Dam1c ring assembly at the budding yeast outer kinetochore
Source: PubMed Central journal article supplement (PMC8441410; doi:10.15252/embj.2021108004), 2021-07-27
Supplement: EMBJ-40-e108004-s001.pdf [file EMBJ-40-e108004-s001.pdf]

**Appendix for “Phospho-regulated Bim1/EB1 interactions trigger Dam1c ring assembly at the budding yeast outer kinetochore” by Alexander Dudziak, Lena Engelhard, Cole Bourque, Björn Udo Klink, Pascaline Rombaut, Nikolay Kornakov, Karolin Jänen, Franz Herzog, Christos Gatsogiannis and Stefan Westermann**

**Table of contents**

|                                          |   |
|------------------------------------------|---|
| Appendix Figure S1 .....                 | 2 |
| Appendix Figure S1 – Figure Legend ..... | 3 |
| Appendix Figure S2 .....                 | 4 |
| Appendix Figure S2 – Figure Legend ..... | 4 |
| Appendix Figure S3 .....                 | 5 |
| Appendix Figure S3 – Figure Legend ..... | 5 |
| Appendix Table S1 .....                  | 6 |
| Appendix Table S2 .....                  | 7 |
| Appendix Table S3 .....                  | 8 |

# Appendix Figure S1

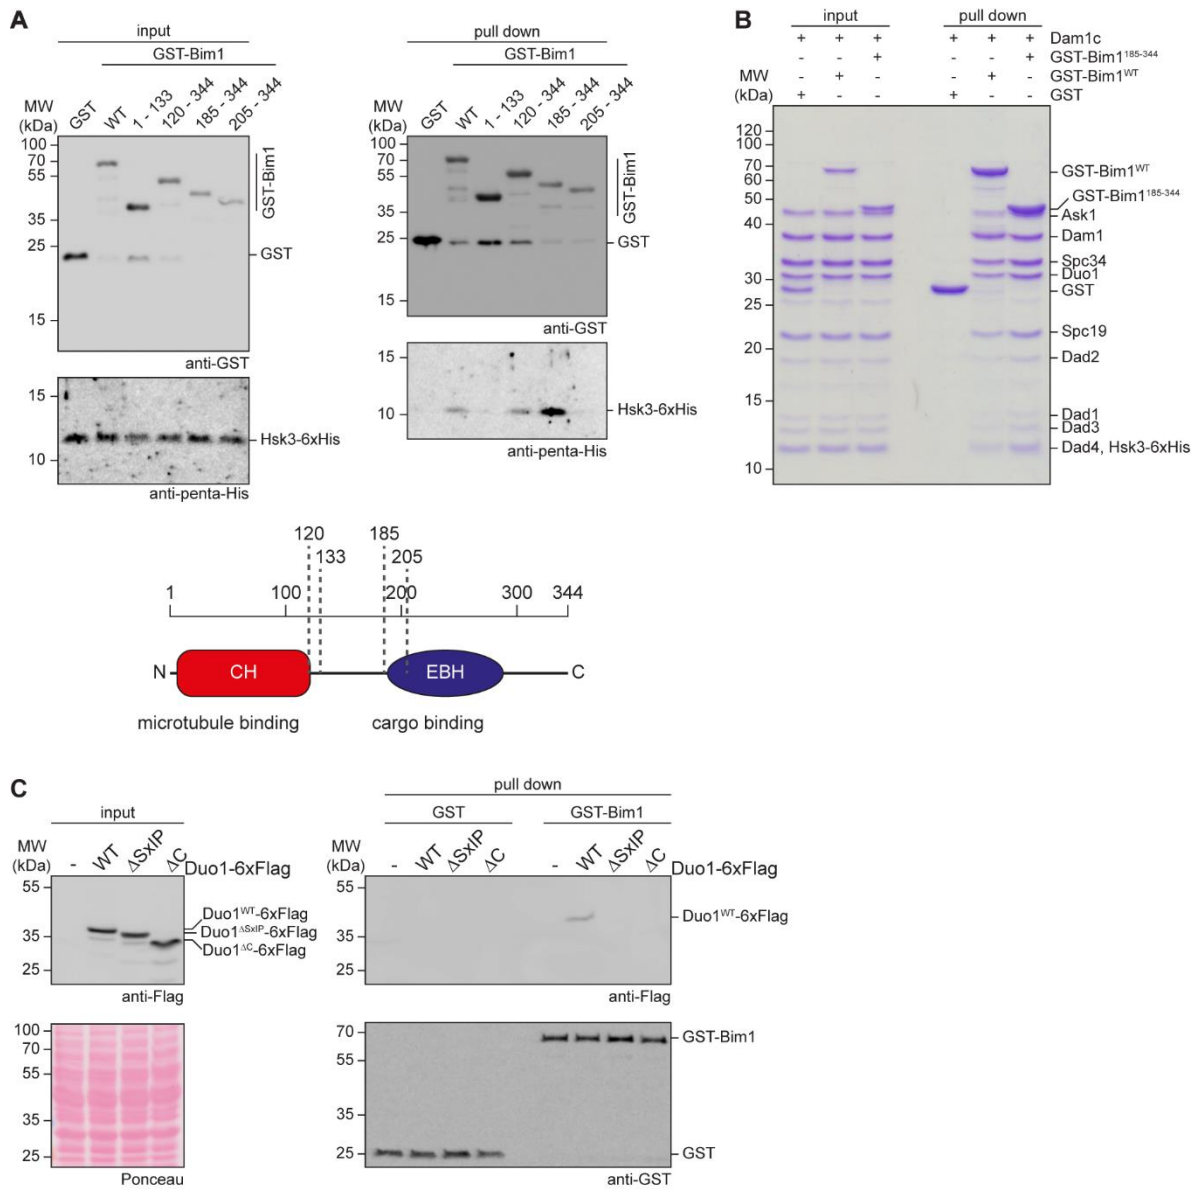

## Appendix Figure S1 – Figure Legend

### Formation of the Dam1c-Bim1 complex is mediated by an SxIP-EBH interaction

A: Recombinant GST fusions of truncated Bim1 were immobilized on beads and incubated with recombinant Dam1<sup>WT</sup>c. Input and pull down samples were analyzed by western blot (top). Fusion proteins comprised the CH domain (1 – 133), linker and EBH domain (120 – 344), EBH domain (185 – 344) or an N-terminally truncated EBH domain (205 – 344). An illustration of Bim1 highlighting the relevant domains is depicted at the bottom. For reasons of simplicity, Bim1 is shown as monomer. CH: calponin homology, EBH: end-binding homology.

B: Pull down assay as described in A. GST, GST-Bim1<sup>WT</sup> and GST-Bim1<sup>185-344</sup> were immobilized on beads and incubated with Dam1c. Input and pull down samples were analyzed by SDS-PAGE and Coomassie staining.

C: Pull down assay with cell lysates from yeast strains expressing different 6xFlag-tagged Duo1 alleles. Immobilized GST-Bim1 was incubated with soluble cell lysates and binding of Duo1-6xFlag was analyzed by western blot analysis of pull down samples. Duo1<sup>ΔC</sup> is an R223Stop mutation which truncates Duo1 immediately in front of the SxIP motif.

## Appendix Figure S2

A

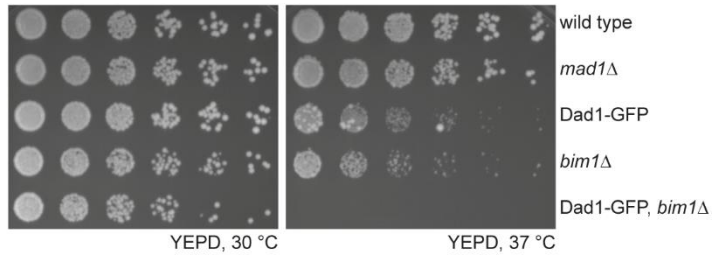

B

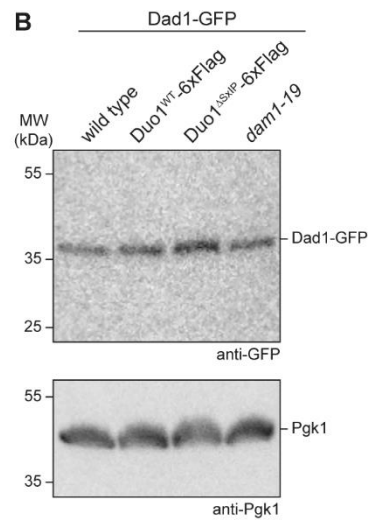

### Appendix Figure S2 – Figure Legend

#### Further analysis of various Dad1-GFP strains

A: Serial dilution assay of Dad1-GFP and *bim1*Δ strains. Cells were spotted as serial dilution on YEPD plates and incubated at 30 °C and 37 °C.

B: Western blot analysis of cellular Dad1-GFP levels in strains with different Duo1 and Dam1 alleles. Pgk1 was used as loading control.

## Appendix Figure S3

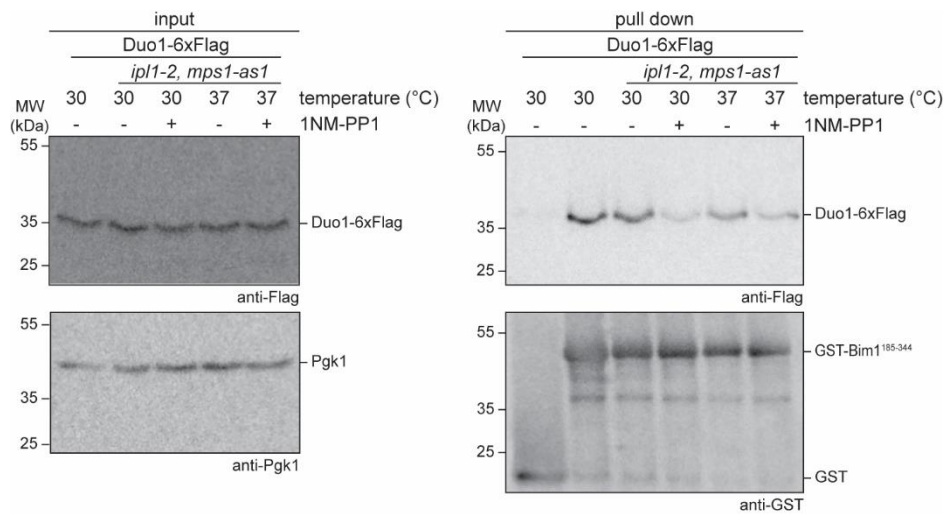

### Appendix Figure S3 – Figure Legend

#### Inhibition of Mps1 impairs Dam1c-Bim1 binding

A strain carrying both the analog sensitive *mps1-as1* and temperature sensitive *ipl1-2* alleles was grown under the indicated conditions (30 °C or 37 °C, in the absence or presence of 10  $\mu$ M 1NM-PP1). A strain with wild type alleles of both kinases was used as control. Binding of Dam1c to immobilized GST-Bim1<sup>185-344</sup> was analyzed in a pull down assay. Pgk1 serves as loading control.

## Appendix Table S1

| Protein | Position | Position in Bim1 |
|---------|----------|------------------|
| Spc34   | K46      | K110             |
| Spc34   | K46      | K134             |
| Spc34   | K46      | K145             |
| Spc34   | K70      | K145             |
| Spc34   | K169     | K145             |
| Spc34   | K249     | K145             |
| Spc34   | K274     | K145             |
| Dam1    | K252     | K110             |
| Dam1    | K252     | K145             |
| Dam1    | K307     | K110             |
| Dam1    | K307     | K223             |
| Dam1    | K320     | K110             |
| Dam1    | K320     | K145             |
| Spc19   | K79      | K110             |
| Spc19   | K79      | K122             |
| Spc19   | K79      | K145             |
| Dad4    | K21      | K145             |
| Duo1    | K236     | K223             |

## Appendix Table S1

List of crosslinks between Bim1 and subunits of Dam1c.

## Appendix Table S2

| Protein | Position | Position in Duo1 |
|---------|----------|------------------|
| Spc34   | K70      | K33              |
| Spc34   | K94      | K33              |
| Spc34   | K70      | K36              |
| Spc34   | K46      | K215             |
| Spc34   | K46      | K236             |
| Spc34   | K65      | K236             |
| Spc34   | K70      | K236             |
| Spc34   | K126     | K236             |
| Spc19   | K79      | K183             |
| Spc19   | K76      | K236             |

**Appendix Table S2** List of crosslinks between Duo1 and Spc19 and Spc34 in the presence of Bim1.

### Appendix Table S3

| Position in Dam1 | Position in Duo1 |
|------------------|------------------|
| K252             | K169             |
| K252             | K177             |
| K252             | K183             |
| K252             | K215             |
| K252             | K236             |
| K256             | K131             |
| K256             | K169             |
| K256             | K236             |
| K307             | K169             |
| K307             | K183             |
| K307             | K215             |
| K307             | K236             |
| K320             | K169             |
| K320             | K174             |
| K320             | K215             |
| K320             | K236             |

**Appendix Table S3** List of identified crosslinks between Duo1 and the C-terminus of Dam1. Only crosslinks involving lysine residues which are not present in *dam1-19* (Q205Stop) are listed.
